# Supplementary material for: Epigenetic Silencing of LMX1A Contributes to Cancer Progression in Lung Cancer Cells
Source: MDPI journal article supplement (doi:10.3390/ijms21155425), 2020-07-30
Supplement: s1 [file s1]

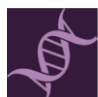

## Supplementary Materials

**Table 2.** Primer sequences used for MSP, Q-MSP, bisulfite sequencing, and qRT-PCR.

| Gene                | Primer Sequences                     | Application |
|---------------------|--------------------------------------|-------------|
| <i>LMX1A</i> -M-R   | 5'-TTTAGAAGCGGCGGGAC-3'              | MSP         |
| <i>LMX1A</i> -M-R   | 5'-CCGAATCCAAACACGCG-3'              | MSP         |
| <i>LMX1A</i> -U-F   | 5'-GAGTTTAGAAGTGGGTGGGATG-3'         | MSP         |
| <i>LMX1A</i> -U-R   | 5'-CAACCAAATCCAAACACACAAAAC-3'       | MSP         |
| <i>LMX1A</i> -BS06F | 5'-AAGTTGATTTGAAATGTATTTAAGAGTGAG-3' | BS          |
| <i>LMX1A</i> -BS06R | 5'-TAAATATATAAAAAATAAATACCCTCCCTC-3' | BS          |
| <i>LMX1A</i> -QMSPF | 5'-TGGGACGCGGGATTGTAAATTTTAT-3'      | Q-MSP       |
| <i>LMX1A</i> -QMSPR | 5'-AAACCCTCGAAACGTCTCTACAAAA-3'      | Q-MSP       |
| <i>LMX1A</i> -387F  | 5'-TCAGAAGGGTGATGAGTTTGTCC-3'        | qRT-PCR     |
| <i>LMX1A</i> -585R  | 5'-GGGGCGCTTATGGTCCTTG-3'            | qRT-PCR     |
| <i>CDH1</i> -1129F  | 5'-CCCACCACGTACAAGGGTC-3'            | qRT-PCR     |
| <i>CDH1</i> -1304R  | 5'-ATGCCATCGTTGTTCACTGGA-3'          | qRT-PCR     |
| <i>CDH2</i> -890F   | 5'-CAGATAGCCCGGTTTCATTTGA-3'         | qRT-PCR     |
| <i>CDH2</i> -1053R  | 5'-CAGGCTTTGATCCCTCAGGAA-3'          | qRT-PCR     |
| <i>FN1</i> -242F    | 5'-GAAGCCGAGGTTTAACTGC-3'            | qRT-PCR     |
| <i>FN1</i> -327R    | 5'-ACCCACTCGGTAAGTGTTCC-3'           | qRT-PCR     |
| <i>ID2</i> -431F    | 5'-CCACTATTGTCAGCCTGCATC-3'          | qRT-PCR     |
| <i>ID2</i> -610R    | 5'-AGAAATCATGAACACCGCTTA-3'          | qRT-PCR     |
| <i>GAPDH</i> -943F  | 5'-ACCCACTCCTCCACCTTTGACG-3'         | qRT-PCR     |
| <i>GAPDH</i> -1107R | 5'-TCTCTTCCTCTTGCTCTTG-3'            | qRT-PCR     |
| <i>MYC</i> -1201F   | 5'-GGCAAAAGGTCAGAGTCTGG-3'           | qRT-PCR     |
| <i>MYC</i> -1409R   | 5'-GTGCATTTTCGGTTGTTGC-3'            | qRT-PCR     |

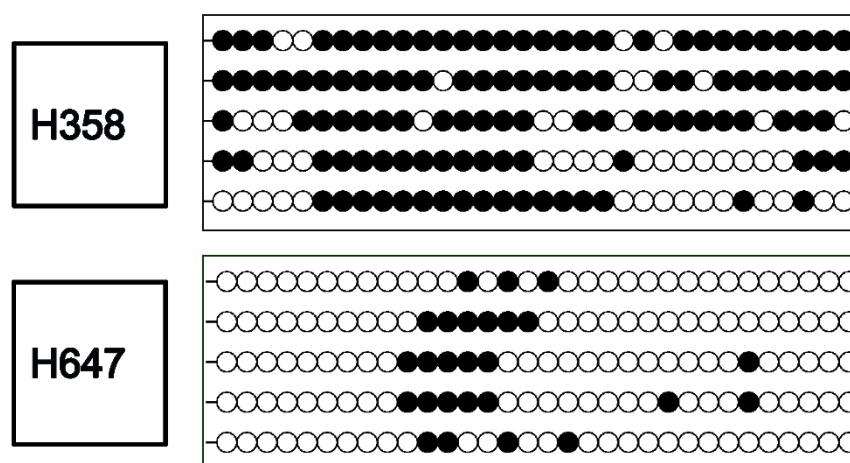

**Figure S1.** Bisulfite genomic sequencing analysis of the CpG sites located at the promoter region of *LMX1A*. The *LMX1A* methylation status in H358 and H647 cell lines was analyzed by bisulfite genomic sequencing. Each clone is represented by a row, and 32 CpG sites are represented as circles. Black circles and white circles represent methylated and unmethylated CpG sites, respectively.

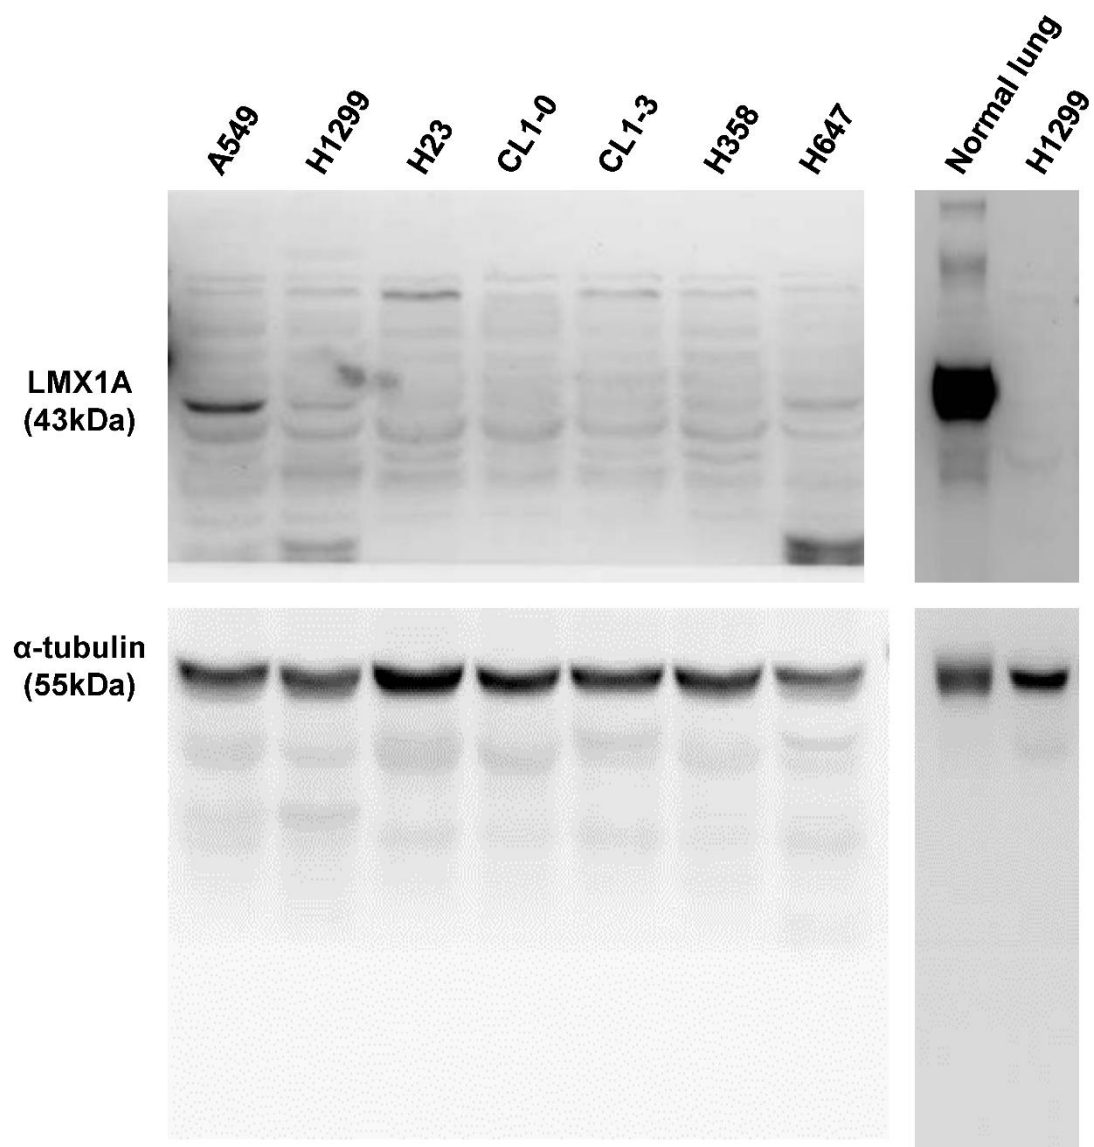

**Figure S2-1. Protein expression of LMX1A in human NSCLC cells, normal lung tissues, and NSCLC cells with expression of LMX1A.** LMX1A expression was analyzed by Western blotting in human NSCLC cell lines and normal lung tissues using an anti-LMX1A antibody.  $\alpha$ -Tubulin was used as an internal control.

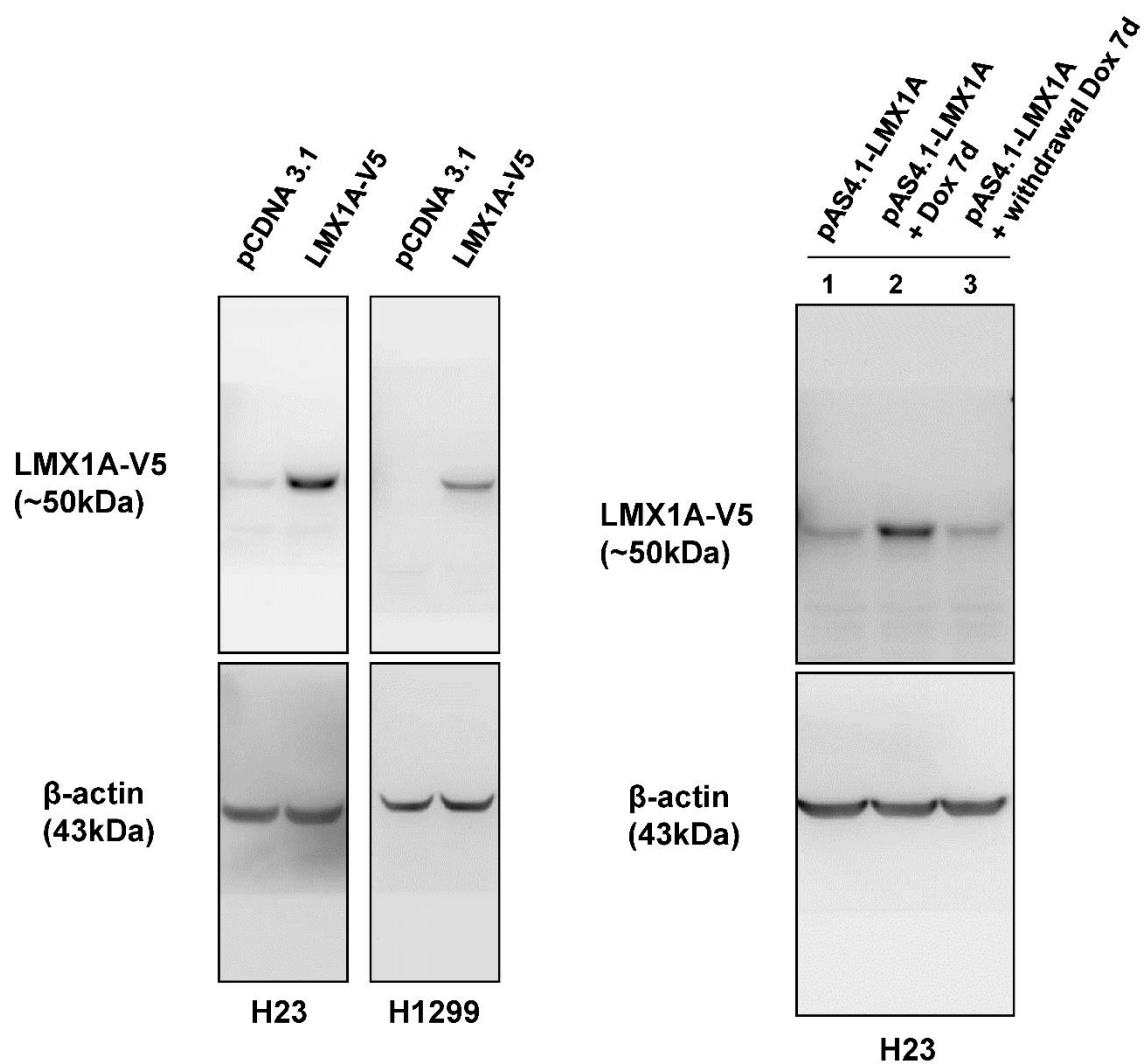

**Figure S2-2. Protein expression of LMX1A in human NSCLC cells, normal lung tissues, and NSCLC cells with expression of LMX1A-V5.** LMX1A expression was analyzed by Western blotting in human NSCLC cell lines and normal lung tissues using an anti-V5 antibody. β-Actin was used as an internal control.

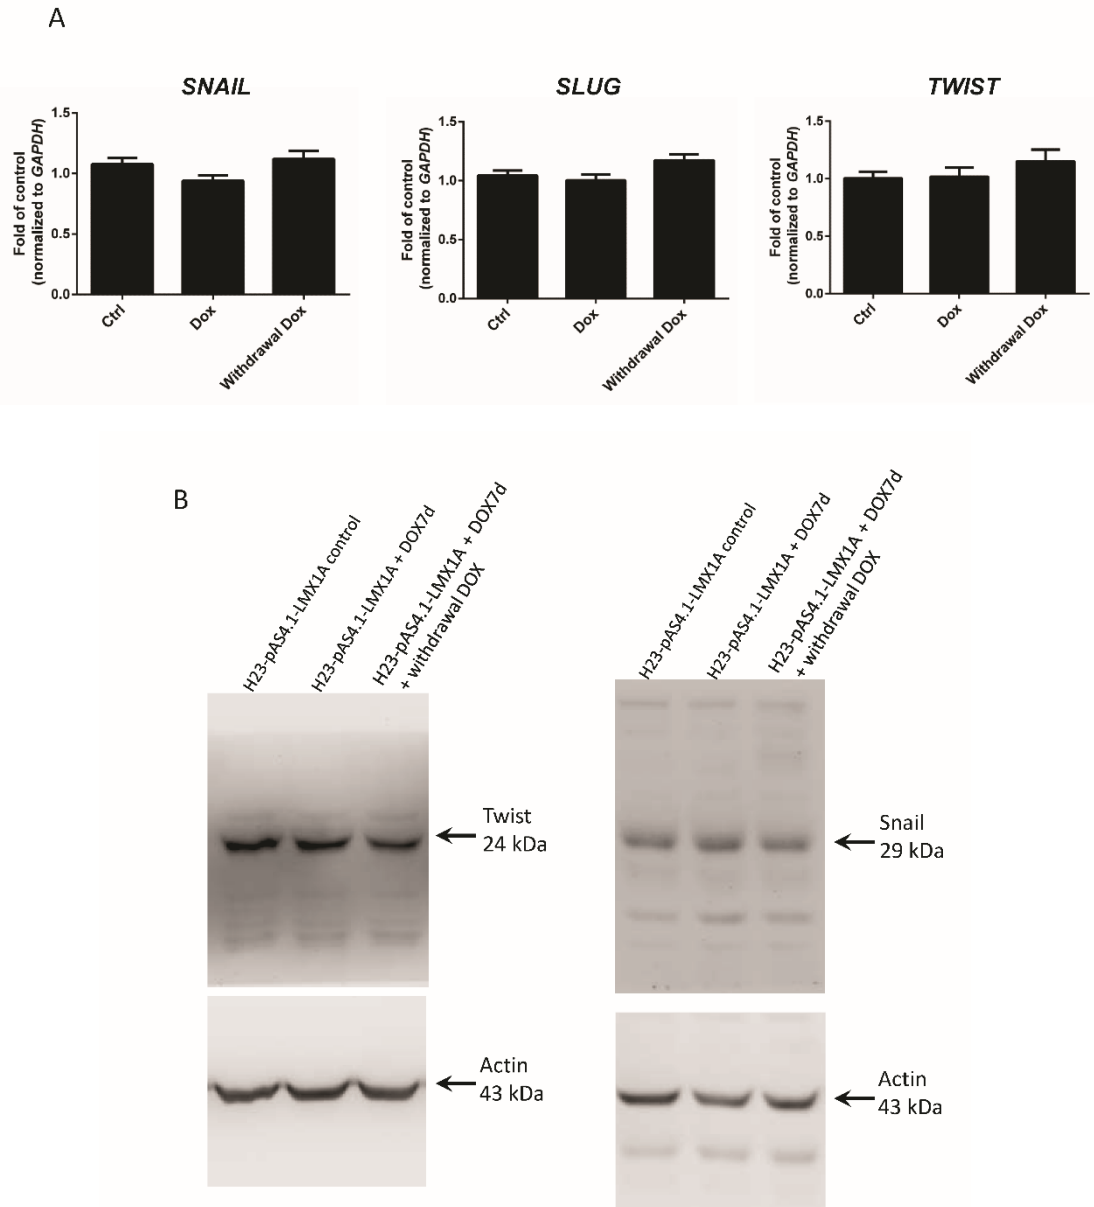

**Figure S3. Effects of LMX1A on EMT-related transcription factors in NSCLC cells.** The expression of EMT-related transcription factors (*SNAIL*, *SLUG*, and *TWIST*) was detected by qRT-PCR (A) and Western blotting (B) after induction of *LMX1A* in H23 cells. Data are shown as fold changes of mRNA expression relative to control cells without doxycycline. qRT-PCR are expressed as the mean  $\pm$  SEM from three independent experiments, each conducted in duplicate.  $\beta$ -Actin was used as an internal control.

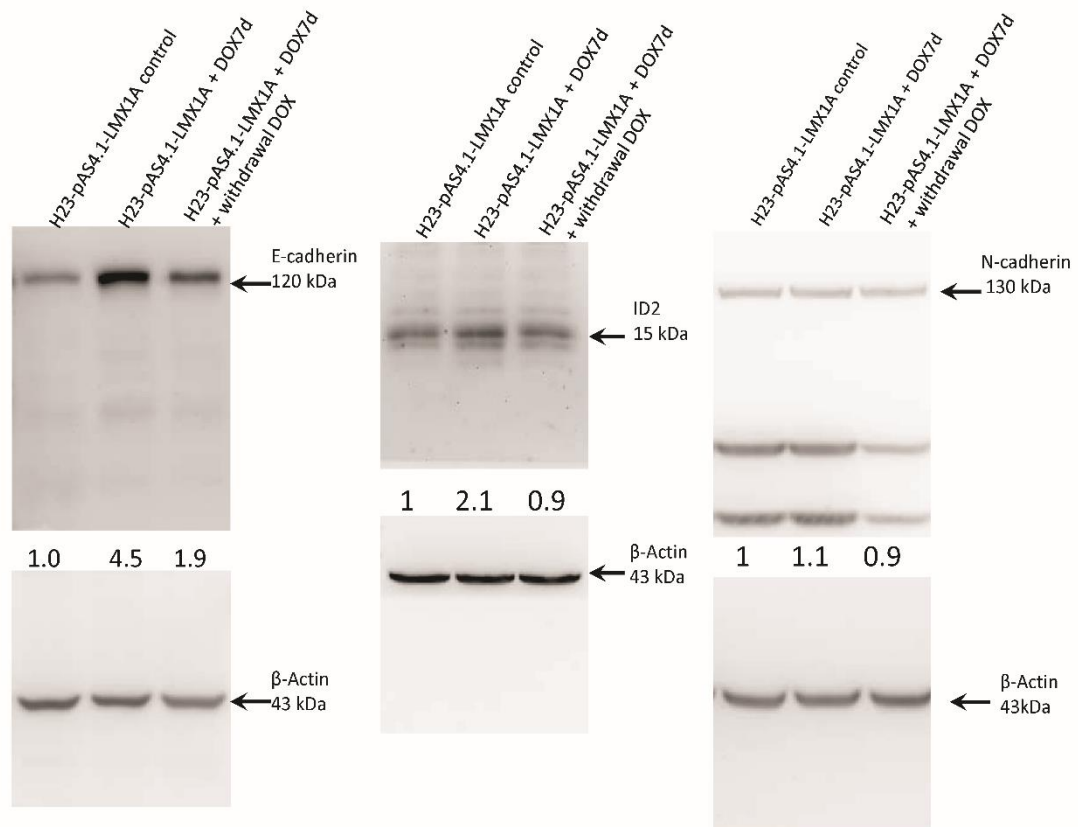

**Figure S4.** Effects of LMX1A on EMT-related genes in NSCLC cells. The protein expression of EMT-related genes (E-cadherin, ID2, and N-cadherin) was detected by Western blotting after induction of *LMX1A* in H23 cells. The numbers in the blot represent the ratios between and the EMT-related genes (E-cadherin, ID2, and N-cadherin) and internal control.

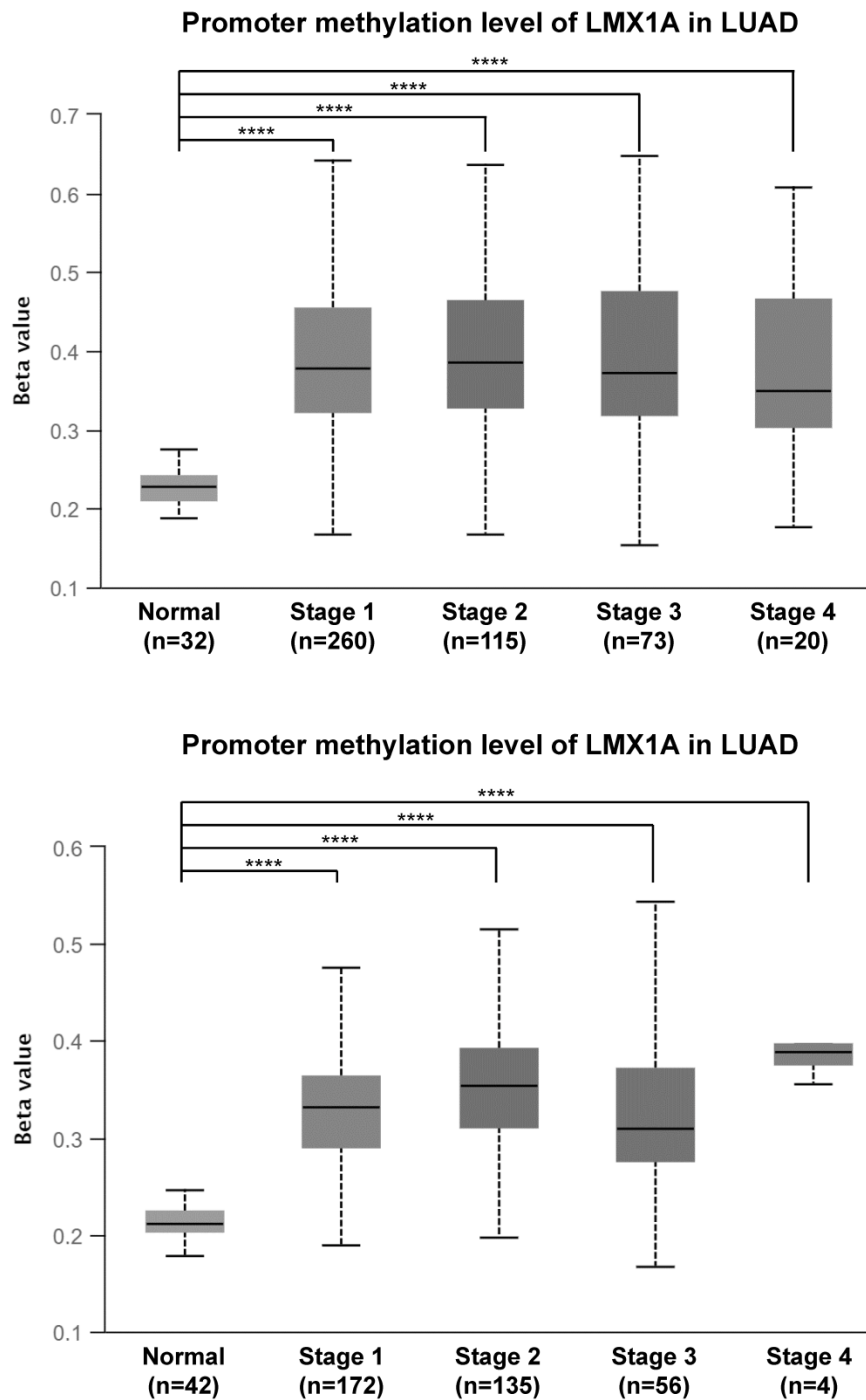

**Figure S5.** The methylation of *LMX1A* in NSCLC patients according to tumor stages, analyzed from The Cancer Genome Atlas (TCGA) database through the UALCAN (<http://ualcan.path.uab.edu>) web portal. The methylation of *LMX1A* in NSCLC patients occurred early in stage I patients and then maintained through all the stages. LUAD: Lung adenocarcinoma; LUSC: Lung squamous cell carcinoma. \*\*\*\*  $p < 0.0001$  (Student's  $t$ -test).

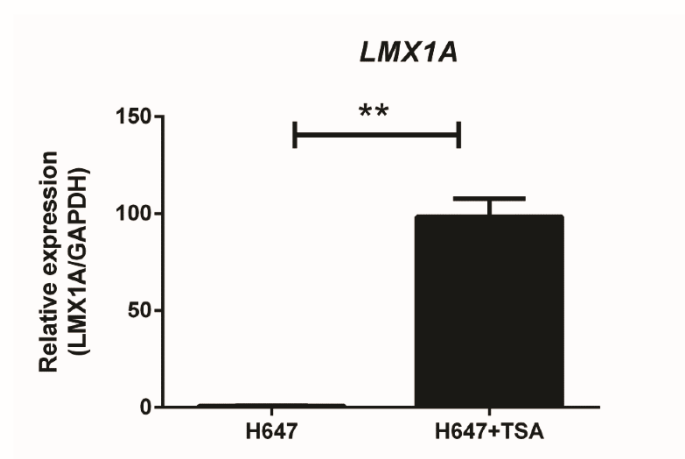

**Figure S6. Reexpression of LMX1A after treatment of histone deacetylase (HDAC) inhibitors in H647 lung cancer cells.** Cells were treated with the HDAC inhibitor (trichostatin A, TSA) for 1 day to restore LMX1A expression. The cells were then depleted of the drugs and cultured for 2 more days. qRT-PCRs are expressed as the mean  $\pm$  SEM from two independent experiments, each conducted in duplicate. \*\*  $p < 0.01$  (Mann–Whitney U test or Student's *t*-test).

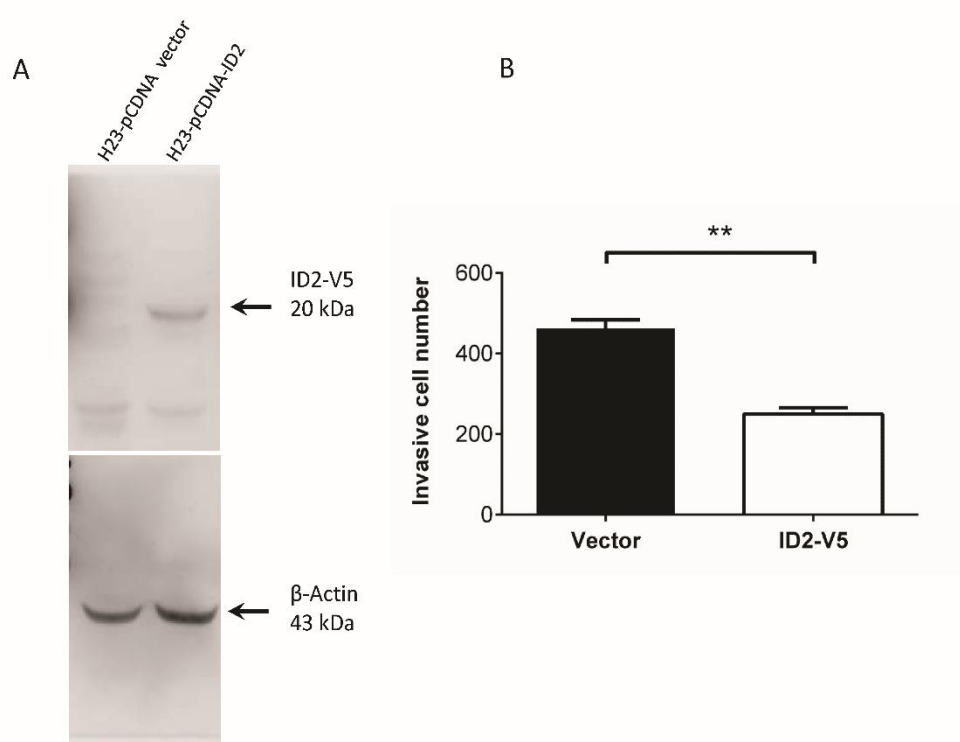

**Figure S7. Transient overexpression of ID2 suppresses the invasion of cancer cells.** (A) Expression of ID2 in H23 NSCLC cells transiently transfected with *ID2-V5* or the empty vector (pCDNA3.1) was analyzed by Western blots using an anti-V5 antibody.  $\beta$ -Actin was used as an internal control. Matrigel invasion assays were performed using H23 cells expressing *ID2-V5* or the empty vector. These results are presented as the mean  $\pm$  SEM from two independent experiments in triplicate. \*\*  $p < 0.01$  (Mann–Whitney U test).

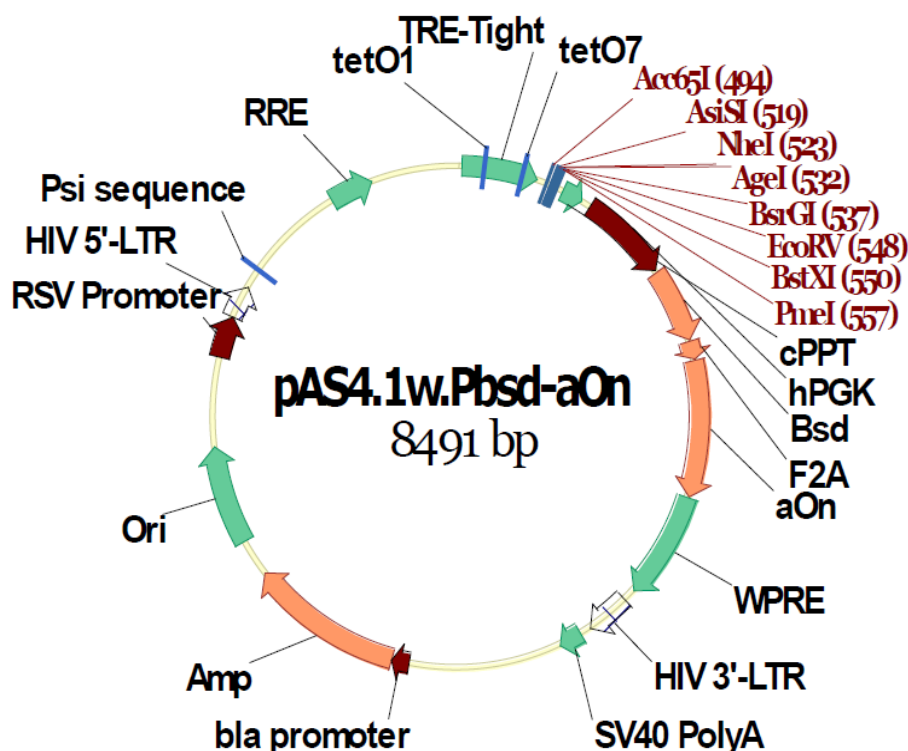

**Figure S8. Map of pAS4.1w.Pbsd-aOn.** pAS4.1w.Pbsd-aOn is an all-in-one tetracycline-inducible plasmid (TRE tight version that contains 7 copies of the modified tetO sequence, a tetracycline repressor binding sequence). ORF of *aOn* TRE transactivator (function as a transcriptional factor) was introduced into the downstream of the *bsd* gene by fusing it with the F2A sequence to link *bsd* ORF. The *aOn* ORF has the same reading frame as *bsd*; as a result, this fusion protein will be post-translationally cleaved by F2A protease into aOn and bsd functional proteins.

## Supplementary Methods

### Cell lines and protein extract of normal lung tissues

Eight human lung cancer cell lines (A549, H1437, H23, CL1-0, CL1-3, H358, H1299, and H647) were used in this study. They were a kind gift from Professor Yi-Ching Wang (National Cheng Kung University, Taiwan). Cells were cultured in Roswell Park Memorial Institute (RPMI) 1640 medium (GIBCO, Gaithersburg, MD, USA) supplemented with 2 mM L-glutamine, 1% nonessential amino acids (NEAA), 10% heat-inactivated fetal bovine serum (FBS), 100 U/ml penicillin, and 100 µg/ml streptomycin (GE Healthcare Life Sciences, Chicago, IL, United States). All cell cultures were grown as monolayer cultures and maintained in a humidified atmosphere containing 5% CO<sub>2</sub> in air at 37 °C. The protein extract of normal human lung tissues was commercially obtained from the biotechnology company (GenDiscovery, Taipei, Taiwan).

### Western Blot Analysis

Protein was extracted from cells using ice-cold RIPA buffer (50 mM Tris HCl (pH 7.4), 150 mM NaCl, 1 mM EDTA, 1% (v/v) Triton-X 100, 0.1% (w/v) SDS) supplemented with phenylmethylsulfonyl fluoride (PMSF) and protease inhibitor cocktail (2 mM AEBSF, 1 mM EDTA, 130 µM bestatin, 14 µM E-64, 1 µM leupeptin, 0.3 µM aprotinin). Protein concentrations were determined using a bicinchoninic acid (BCA) assay according to the manufacturer's instructions. Equivalent amounts of protein were separated on 12% SDS-PAGE gels and transferred to polyvinylidene difluoride (PVDF) membranes (Millipore, Billerica, MA, USA). Membranes were blocked at room temperature with 5% nonfat milk in Tris-buffered saline (TBS) containing 0.1% Tween 20 (TBS-T) for 1 h. Primary antibodies were diluted 1:2000 and incubated overnight at 4 °C. Secondary antibodies diluted 1:5000



were added and incubated at room temperature for 1 h. Signals were detected using ECL detection reagent (Millipore) following the manufacturer's instructions. The primary antibodies used were as follows: Mouse anti-V5 (Bio-Rad Laboratories, Taiwan), anti-LMX1A (GTX77819, GeneTex, CA, USA), anti-TWIST (ab49254; abcam, Cambridge, MA, USA), anti-SNAIL (GTX100754; GeneTex, Irvine, CA, USA), anti-E-cadherin (610405; BD Biosciences, San Jose, CA, USA), anti-N-cadherin (sc-6260; Santa Cruz Biotechnology, Santa Cruz, CA, USA), anti-ID2 (AF4660, R&D, Minneapolis, MN, USA), and rabbit anti- $\beta$ -actin (GeneTex, CA, USA). Horseradish peroxidase-conjugated rabbit anti-mouse or goat anti-rabbit secondary antibodies (GeneTex, CA, USA) were used as appropriate.

#### *MTS Prolifeation Assay*

MTS assays were performed with the Cell Titer 96 AQ One Solution Cell Proliferation Assay (Promega Corporation, Madison, WI) (17). MTS reagent (20  $\mu$ L/well) was added to 100  $\mu$ L of medium containing cells in each well of 96-well plates and left for 4 h at 37 °C under humidified 5% CO<sub>2</sub> in air. For colorimetric analysis, the absorbance at 490 nm was recorded using a microplate reader. Each condition was repeated at least three times. Total cells were harvested at the designated times after treatment.

#### *Colony formation*

Cells were trypsinized and resuspended in 1.5 ml of 0.5% agarose, and then poured onto a 1.5 ml 1% agarose bed in 35 mm tissue culture dishes. After 3–4 weeks, cells were stained with a solution containing 0.005% crystal violet, 1.9% formaldehyde, and 0.15 M NaCl, for 30 min. After washing and drying, colonies larger than 1 mm were counted.

#### *Invasion assay*

In vitro cell invasion was determined in 24-well Transwell plates (Coster) with a Matrigel (BD Biosciences) coating. Stable transfectants expressing *LMX1A* were suspended in optimum medium at a concentration of  $1\sim5 \times 10^4$  cells/ml, placed in the upper chambers, and incubated for 16–24 h at 37 °C in 5% CO<sub>2</sub>. Noninvasive cells in the upper chamber were subsequently removed with a cotton-tip applicator. Invasive cells on the lower surface were fixed with methanol and stained with hematoxylin. The number of invasive cells were determined by counting 10 high-power fields (100 $\times$  magnification) on each membrane and calculated as the mean number of cells per field. All cell lines were assayed in duplicate for each experiment, and each experiment was repeated three times.

#### *Transfection*

Cells plated in 100 mm dishes were transfected at 50–80% confluence with *LMX1A* expression vectors or with control vectors, using the liposome-mediated transfection method. To establish cells stably expressing *LMX1A*, H23 and H1299 cells were transfected with the plasmid of choice (pcDNA3.1-*LMX1A* or pAS4.1-*LMX1A*) for two days, and then trypsinized and plated at low density. Stable mixed clones were selected by maintaining cells in medium containing the G418 or blasticidin antibiotic.
