# Supplementary material for: Epigenetic Silencing of LMX1A Contributes to Cancer Progression in Lung Cancer Cells
Source: Int J Mol Sci. 2020 Jul 30;21(15):5425. doi: 10.3390/ijms21155425 (PMC7432919; doi:10.3390/ijms21155425)
Supplement: Supplementary file 1 [file ijms-21-05425-s001.zip › nansting supp Table S1_0615.xlsx]

## Sheet: Sheet1
Table S1
Probe Name	Accession #	NS Probe ID	Analyte Type	LMX1A vs. Control	P value of: LMX1A vs. Control	EMT spectrum	Progression Categories	Annotation
CLEC2B	NM_005127.2	NM_005127.2:980	mRNA	1.1937	0.0325094		ECM Layers, EMT	Epithelial to Mesenchymal Transition, Plasma Membrane
EPHA2	NM_004431.2	NM_004431.2:1525	mRNA	1.4111	0.00423543		Angiogenesis, ECM Layers, Tumor Growth, Tumor Invasion	Angiogenesis Response, Cell Adhesion, Cell Proliferation, Plasma Membrane, Regulation of Angiogenesis, Vasculogenesis
SMAD1	NM_005900.2	NM_005900.2:1850	mRNA	1.41686	0.0145691		Transcription Factor, Tumor Growth	Cell Proliferation, Cellular Growth Factor, TGFB Signaling, Transcription Factor
ADD1	NM_001119.4	NM_001119.4:622	mRNA	1.41701	0.0122512		Angiogenesis, ECM Layers, Transcription Factor, Tumor Invasion	Cellular Differentiation, Plasma Membrane, Positive Regulation of Angiogenesis, Transcription Factor
SIRT1	NM_012238.4	NM_012238.4:1595	mRNA	1.4529	0.0441247		Angiogenesis	Angiogenesis Response
ADAM9	NM_001005845.1	NM_001005845.1:695	mRNA	1.55275	0.0431229		ECM Layers, ECM Remodeling, Tumor Growth, Tumor Invasion	Cell Adhesion, Cellular Growth Factor, Collagen Family, Integral to Membrane, MMP Remodeling, Plasma Membrane
DAG1	NM_001165928.2	NM_001165928.2:965	mRNA	1.61601	0.0364911		ECM Layers, ECM Remodeling, Tumor Invasion	Basement Membrane, Cell Adhesion, ECM Receptor Interation, Integral to Membrane, Plasma Membrane
PLCG1	NM_002660.2	NM_002660.2:2290	mRNA	1.65815	0.00792602		Angiogenesis, Cancer Metabolism, ECM Layers, Hypoxia, Tumor Growth	Blood Coagulation, Cellular Growth Factor, Choline Cancer Metabolism, HIF1A Signaling, Plasma Membrane, Positive Regulation of Angiogenesis, VEGFA Signaling
TCF20	NM_005650.1	NM_005650.1:925	mRNA	1.69088	0.0397737		Metastasis	Metastasis Response
CREBBP	NM_001079846.1	NM_001079846.1:4818	mRNA	1.85209	0.0283649		Tumor Growth, Hypoxia, Transcription Factor	HIF1A Signaling, Hypoxia Response, TGFB Signaling, Transcription Factor
ID2	NM_002166.4	NM_002166.4:505	mRNA	1.9949	0.00435035		Transcription Factor, Tumor Growth	Cell Proliferation, TGFB Signaling, Transcription Factor, Stem Cell Associated
LEFTY1	NM_020997.2	NM_020997.2:1405	mRNA	2.91027	0.0437489		Tumor Growth	Cellular Growth Factor, TGFB Signaling
THBS1	NM_003246.2	NM_003246.2:3465	mRNA	3.25843	0.0395245		Angiogenesis, ECM Layers, ECM Remodeling, Hypoxia, Tumor Growth, Tumor Invasion	Blood Coagulation, Cell Adhesion, Cell Cycle, Cell Proliferation, ECM Receptor Interation, ECM Structure, Hypoxia Response, Negative Regulation of Angiogenesis, Plasma Membrane, Positive Regulation of Angiogenesis, Sprouting Angiogenesis, TGFB Signaling
ZEB1	NM_001128128.1	NM_001128128.1:1450	mRNA	'-1.0350641	0.0360041		Tumor Growth, EMT, Transcription Factor	Cell Proliferation, EMT to Metastasis, Epithelial to Mesenchymal Transition, Transcription Factor
AAMP	NM_001087.3	NM_001087.3:412	mRNA	'-1.22870266	0.0298139		Angiogenesis, ECM Layers	Angiogenesis Response, Plasma Membrane
GTF2I	NM_033001.2	NM_033001.2:920	mRNA	'-1.24556828	0.0213613		Angiogenesis, Transcription Factor	Negative Regulation of Angiogenesis, Transcription Factor
AHNAK	NM_001620.2	NM_001620.2:14454	mRNA	'-1.24759185	0.0238934		EMT	Epithelial to Mesenchymal Transition
TP53	NM_000546.2	NM_000546.2:1330	mRNA	'-1.27518833	0.0328053		Cancer Metabolism, Transcription Factor, Tumor Growth	Carbon Cancer Metabolism, Cell Cycle, Cell Proliferation, Regulation of Metabolism, Transcription Factor
SERPINH1	NM_001235.2	NM_001235.2:880	mRNA	'-1.27714956	0.0121346		ECM Layers, ECM Remodeling	Collagen Family, MMP Remodeling
RAC1	NM_198829.1	NM_198829.1:1250	mRNA	'-1.29705751	0.0269561		Angiogenesis, Cancer Metabolism, ECM Layers, EMT, Tumor Invasion	Blood Coagulation, Cell Adhesion, Cell Motility, Cellular Differentiation, Choline Cancer Metabolism, Plasma Membrane, VEGFA Signaling
CAMP	NM_004345.3	NM_004345.3:220	mRNA	'-1.29931664	0.00709902		Angiogenesis	Positive Regulation of Angiogenesis
CLDN7	NM_001307.3	NM_001307.3:175	mRNA	'-1.29931664	0.00709902		ECM Layers, EMT, Tumor Invasion	Cell Adhesion, Epithelial to Mesenchymal Transition, Integral to Membrane, Plasma Membrane
CXCL11	NM_005409.3	NM_005409.3:590	mRNA	'-1.29931664	0.00709902		ECM Remodeling	MMP Remodeling
CXCR3	NM_001504.1	NM_001504.1:80	mRNA	'-1.29931664	0.00709902		Angiogenesis, ECM Layers, Tumor Invasion	Angiogenesis Response, Cell Adhesion, Cellular Differentiation, Integral to Membrane, Negative Regulation of Angiogenesis, Plasma Membrane, Positive Regulation of Angiogenesis, Stem Cell Associated
FGL2	NM_006682.2	NM_006682.2:250	mRNA	'-1.29931664	0.00709902		EMT	Epithelial to Mesenchymal Transition
FLT1	NM_002019.4	NM_002019.4:530	mRNA	'-1.29931664	0.00709902		Angiogenesis, ECM Layers, Hypoxia, Tumor Growth	Cell Proliferation, Cellular Growth Factor, HIF1A Signaling, Hypoxia Response, Plasma Membrane, Positive Regulation of Angiogenesis, Sprouting Angiogenesis, Vasculogenesis
HOXA7	NM_006896.3	NM_006896.3:1605	mRNA	'-1.29931664	0.00709902		Angiogenesis, Transcription Factor	Angiogenesis Response, Transcription Factor
IFNG	NM_000619.2	NM_000619.2:970	mRNA	'-1.29931664	0.00709902		Angiogenesis, ECM Layers, Hypoxia, Tumor Growth	Cell Cycle, Cell Proliferation, Fibrosis, HIF1A Signaling, TGFB Signaling
PLA2G2D	NM_001271814.1	NM_001271814.1:90	mRNA	'-1.29931664	0.00709902		Angiogenesis	VEGFA Signaling
TMEM100	NM_018286.2	NM_018286.2:655	mRNA	'-1.29931664	0.00709902		Angiogenesis, ECM Layers	Angiogenesis Response, Integral to Membrane
TNFSF10	NM_003810.2	NM_003810.2:115	mRNA	'-1.29931664	0.00709902		ECM Layers	Plasma Membrane
VSIG4	NM_001100431.1	NM_001100431.1:160	mRNA	'-1.29931664	0.00709902		ECM Layers, EMT, Tumor Growth, Tumor Invasion	Cell Proliferation, Cellular Differentiation, Epithelial to Mesenchymal Transition, Integral to Membrane
POSTN	NM_001135935.1	NM_001135935.1:910	mRNA	'-1.30158424	0.0442485		ECM Layers, Tumor Invasion	Cell Adhesion, ECM Structure
PKM	NM_182471.1	NM_182471.1:2105	mRNA	'-1.31734025	0.0058523		Cancer Metabolism, ECM Layers	Carbon Cancer Metabolism, ECM Structure
VIM	NM_003380.2	NM_003380.2:694	mRNA	'-1.33081615	0.0360433		ECM Layers, EMT, Tumor Invasion	Cell Motility, Epithelial to Mesenchymal Transition, Plasma Membrane, Stem Cell Associated
CTNND1	NM_001331.2	NM_001331.2:146	mRNA	'-1.3360486	0.0173228		ECM Layers, EMT	Epithelial to Mesenchymal Transition, Integral to Membrane, Plasma Membrane
ENO1	NM_001428.2	NM_001428.2:1689	mRNA	'-1.35388899	0.0160395		Cancer Metabolism, ECM Layers, Hypoxia, Transcription Factor, Tumor Growth	Cellular Growth Factor, HIF1A Signaling, Plasma Membrane, Regulation of Metabolism, Transcription Factor
DENND5A	NM_015213.2	NM_015213.2:4604	mRNA	'-1.35702193	0.00630054		EMT	Epithelial to Mesenchymal Transition
DLC1	NM_006094.3	NM_006094.3:5650	mRNA	'-1.36923468	0.0330011		Metastasis, Tumor Invasion	Cell Adhesion, Cellular Differentiation, Metastasis Suppressors
CXADR	NM_001338.3	NM_001338.3:1937	mRNA	'-1.39713454	0.031169		Angiogenesis, ECM Layers, EMT, Tumor Invasion	Blood Coagulation, Cell Adhesion, Epithelial to Mesenchymal Transition, Plasma Membrane
COL5A2	NM_000393.3	NM_000393.3:4075	mRNA	'-1.39937663	0.0301258	Mes	ECM Layers, ECM Remodeling, EMT, Tumor Invasion	Cellular Differentiation, Collagen Family, ECM Receptor Interation, ECM Structure, Epithelial to Mesenchymal Transition
TNFRSF1A	NM_001065.2	NM_001065.2:515	mRNA	'-1.40480971	0.0252738		Angiogenesis, Hypoxia	Hypoxia Response, Positive Regulation of Angiogenesis
CDC42	NM_001039802.1	NM_001039802.1:390	mRNA	'-1.40762734	0.0264265		Angiogenesis, ECM Layers	Plasma Membrane, Sprouting Angiogenesis, VEGFA Signaling
TNFRSF12A	NM_016639.1	NM_016639.1:575	mRNA	'-1.41920745	0.0256855		Angiogenesis, ECM Layers, Tumor Invasion	Angiogenesis Response, Cell Adhesion, Integral to Membrane, Plasma Membrane, Regulation of Angiogenesis
ALDOA	NM_184041.2	NM_184041.2:1455	mRNA	'-1.41968668	0.0269967		Angiogenesis, Cancer Metabolism, Hypoxia, Tumor Invasion	Blood Coagulation, Cellular Differentiation, HIF1A Signaling, Regulation of Metabolism
CTSL	NM_001912.4	NM_001912.4:1072	mRNA	'-1.4292382	0.0260152		Metastasis	Metastasis Response
PIK3R2	NM_005027.2	NM_005027.2:3100	mRNA	'-1.43410897	0.0395166		Angiogenesis, Cancer Metabolism, Hypoxia, Tumor Growth	Blood Coagulation, Carbon Cancer Metabolism, Cellular Growth Factor, Choline Cancer Metabolism, HIF1A Signaling, VEGFA Signaling
UBA52	NM_003333.3	NM_003333.3:288	mRNA	'-1.43493605	0.013885		ECM Layers, EMT, Tumor Growth	Cell Cycle, Plasma Membrane
CD46	NM_172350.1	NM_172350.1:365	mRNA	'-1.4723841	0.011786		ECM Layers, EMT	Epithelial to Mesenchymal Transition, Plasma Membrane
SOD1	NM_000454.4	NM_000454.4:35	mRNA	'-1.48166358	0.0215703		Angiogenesis, ECM Layers	Blood Coagulation, ECM Structure, Plasma Membrane
CTSH	NM_148979.2	NM_148979.2:800	mRNA	'-1.50146627	0.0480277		Angiogenesis, EMT, Tumor Growth	Cell Proliferation, Epithelial to Mesenchymal Transition, Positive Regulation of Angiogenesis
RRAS	NM_006270.3	NM_006270.3:330	mRNA	'-1.54537618	0.0377608		Angiogenesis, ECM Layers	Plasma Membrane, Positive Regulation of Angiogenesis
CASP8	NM_001228.4	NM_001228.4:301	mRNA	'-1.55328488	0.00269047		Angiogenesis, ECM Remodeling, Metastasis	Angiogenesis Response, Metastasis Suppressors, MMP Remodeling
RHOA	NM_001664.2	NM_001664.2:1230	mRNA	'-1.59499872	0.0284647		ECM Layers, EMT, Tumor Growth, Tumor Invasion	Cell Adhesion, Cellular Differentiation, Plasma Membrane, TGFB Signaling
AGRN	NM_198576.2	NM_198576.2:2750	mRNA	'-1.64792025	0.0107198		ECM Layers, ECM Remodeling	Basal Lamina, ECM Receptor Interation, ECM Structure, Plasma Membrane
ATPIF1	NM_178190.2	NM_178190.2:334	mRNA	'-1.66299319	0.0371219		Angiogenesis, Tumor Growth	Angiogenesis Response, Cell Proliferation
PDK1	NM_002610.3	NM_002610.3:401	mRNA	'-1.76020682	0.011777		Cancer Metabolism, Hypoxia	Carbon Cancer Metabolism, HIF1A Signaling
LGALS1	NM_002305.3	NM_002305.3:60	mRNA	'-1.81496572	0.023924		ECM Layers, EMT	ECM Structure, Epithelial to Mesenchymal Transition
CDKN1A	NM_000389.2	NM_000389.2:1975	mRNA	'-1.83707321	0.0477416		Hypoxia, Tumor Growth	Cell Cycle, Cell Proliferation, HIF1A Signaling
FBLN1	NM_006487.2	NM_006487.2:965	mRNA	'-1.84507287	0.0229534		ECM Layers, EMT	Basement Membrane, ECM Structure, Epithelial to Mesenchymal Transition
SEMA3E	NM_012431.1	NM_012431.1:2184	mRNA	'-1.90351224	0.0115041		Angiogenesis	Negative Regulation of Angiogenesis, Sprouting Angiogenesis
CXCR4	NM_003467.2	NM_003467.2:1335	mRNA	'-1.99022377	0.0434844	Mes	ECM Layers, EMT, Hypoxia	Epithelial to Mesenchymal Transition, Hypoxia Response, Integral to Membrane, Plasma Membrane, Stem Cell Associated
CKMT1A	NM_001015001.1	NM_001015001.1:286	mRNA	'-2.19464755	0.0145876		EMT	Epithelial to Mesenchymal Transition
TIMP1	NM_003254.2	NM_003254.2:329	mRNA	'-2.28131437	0.012762		Angiogenesis, ECM Layers, ECM Remodeling, Hypoxia, Metastasis, Tumor Growth	Basement Membrane, Blood Coagulation, Cell Proliferation, HIF1A Signaling, LOX Remodeling, Metastasis Suppressors, MMP Remodeling
CRIP2	NM_001270837.1	NM_001270837.1:1042	mRNA	'-2.32546878	0.0349624		ECM Layers, Tumor Growth	Cell Proliferation, ECM Structure
CLU	NM_203339.2	NM_203339.2:1376	mRNA	'-2.56240726	0.0262122		Angiogenesis, ECM Layers, Tumor Growth	Blood Coagulation, Cell Proliferation, ECM Structure
CSF2RB	NM_000395.2	NM_000395.2:492	mRNA	'-2.59863329	0.0019465	Mes	ECM Layers, EMT	Epithelial to Mesenchymal Transition, Integral to Membrane, Plasma Membrane
MYH11	NM_001040113.1	NM_001040113.1:920	mRNA	'-2.59863329	0.0019465		Metastasis	Metastasis Response
PIK3R6	NM_001010855.3	NM_001010855.3:1112	mRNA	'-2.59863329	0.0019465		Angiogenesis	Angiogenesis Response, Blood Coagulation, Positive Regulation of Angiogenesis
APOE	NM_000041.2	NM_000041.2:96	mRNA	'-2.73198891	0.0275725		ECM Layers, Tumor Growth	Cell Proliferation, ECM Structure, Plasma Membrane, Stem Cell Associated
AMH	NM_000479.3	NM_000479.3:1626	mRNA	'-2.80556583	0.0469025		Transcription Factor, Tumor Growth	Cellular Growth Factor, TGFB Signaling, Transcription FactorXX
FN1	NM_212482.1	NM_212482.1:1776	mRNA	'-2.80556583	0.0454793	Mes	Angiogenesis, ECM Layers, ECM Remodeling, EMT, Tumor Invasion	Angiogenesis Response, Basal Lamina, Blood Coagulation, Cell Adhesion, Cell Motility, Collagen Family, ECM Receptor Interation, ECM Structure, Epithelial to Mesenchymal Transition
HGF	NM_000601.4	NM_000601.4:550	mRNA	'-2.82349849	9.102e-05		Angiogenesis, ECM Layers, EMT, Tumor Growth, Tumor Invasion	Blood Coagulation, Cell Proliferation, Cellular Differentiation, Cellular Growth Factor, Epithelial to Mesenchymal Transition, Fibrosis, Positive Regulation of Angiogenesis
SCG2	NM_003469.3	NM_003469.3:1400	mRNA	'-3.88797712	0.0171025		Angiogenesis, Tumor Growth	Angiogenesis Response, Cell Proliferation
SRGN	NR_036430.1	NR_036430.1:65	mRNA	'-4.32693624	0.010841	mes	Angiogenesis, ECM Layers, EMT	Blood Coagulation, Collagen Family, Epithelial to Mesenchymal Transition
All overexpressed genes are represented as values > 1 and all underexpressed genes are represented as values <-1.; Mes: mesenchymal
