# Supplementary material for: Epigenetic Silencing of LMX1A Contributes to Cancer Progression in Lung Cancer Cells
Source: Int J Mol Sci. 2020 Jul 30;21(15):5425. doi: 10.3390/ijms21155425 (PMC7432919; doi:10.3390/ijms21155425)
Supplement: Supplementary file 1 [file ijms-21-05425-s001.zip › Table S3 Raw data invasion assay.xlsx]

## Sheet: Data 1
Table S3. Raw data for colony formation assay and invasion assay
	H23		H1299				H23 inducile system
colony number	Vector	LMX1A-V5	Vector	LMX1A-V5		Ctrl	Dox	Withdrawal Dox
	98	34	220	17		184	65	135
	132	43	216	24		204	48	150
	133	42	247	38		212	64	197
	121	39	227	26		185	46	164
	140	45	235	19		195	59	126
	125	37	210	32		175	45	128
invasive cell number	H23		H1299				H23 inducile system
	Vector	LMX1A-V5	Vector	LMX1A-V5		Ctrl	Dox	Withdrawal Dox
	91	54	1027	96		274	130	171
	95	37	787	115		210	142	194
	110	27	465	42		258	120	198
	106	33	850	65		229	126	189
	100	35	950	89		205	118	170
	115	30	690	78		265	125	200
